# Supplementary material for: An Integrated Transcriptomic Approach to Identify Molecular Markers of Calcineurin Inhibitor Nephrotoxicity in Pediatric Kidney Transplant Recipients
Source: MDPI journal article supplement (doi:10.3390/ijms22115414), 2021-05-21
Supplement: s1 [file s1]

**Supplemental Figure S1.** Top ten significant canonical pathways of CNIT-specific core analysis using IPA. Pathways are presented in descending order of statistical significance. Genes with negative z-scores are represented in green and positive z-scores in red. The percent of CNIT-specific genes altered within each pathway is shown by the top x-axis, with the total number of genes pathway displayed at the end of each horizontal row.

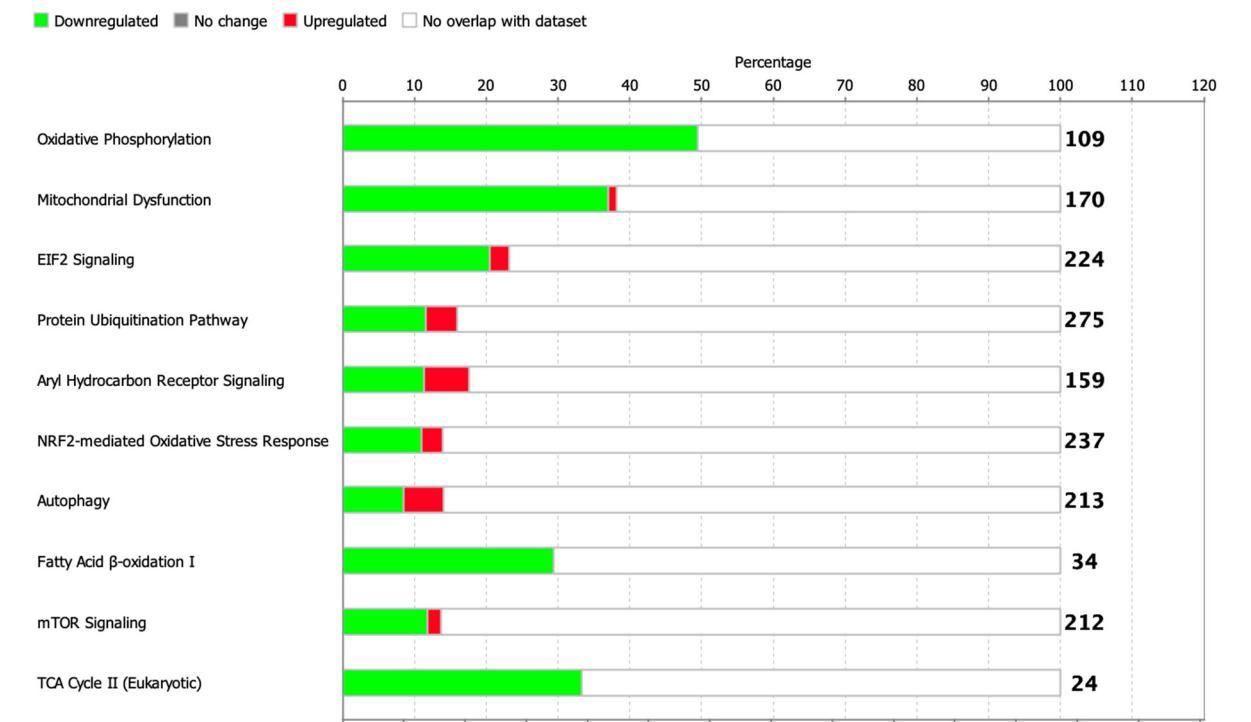

**Supplemental Figure S2. A.** Expected activation state of oxidative phosphorylation from the IPA knowledge database. **B.** Observed measurements of genes involved in oxidative phosphorylation in CNIT samples and predicted downstream inhibition (blue) of NAD<sup>+</sup>, FAD<sup>+</sup>, and ATP.

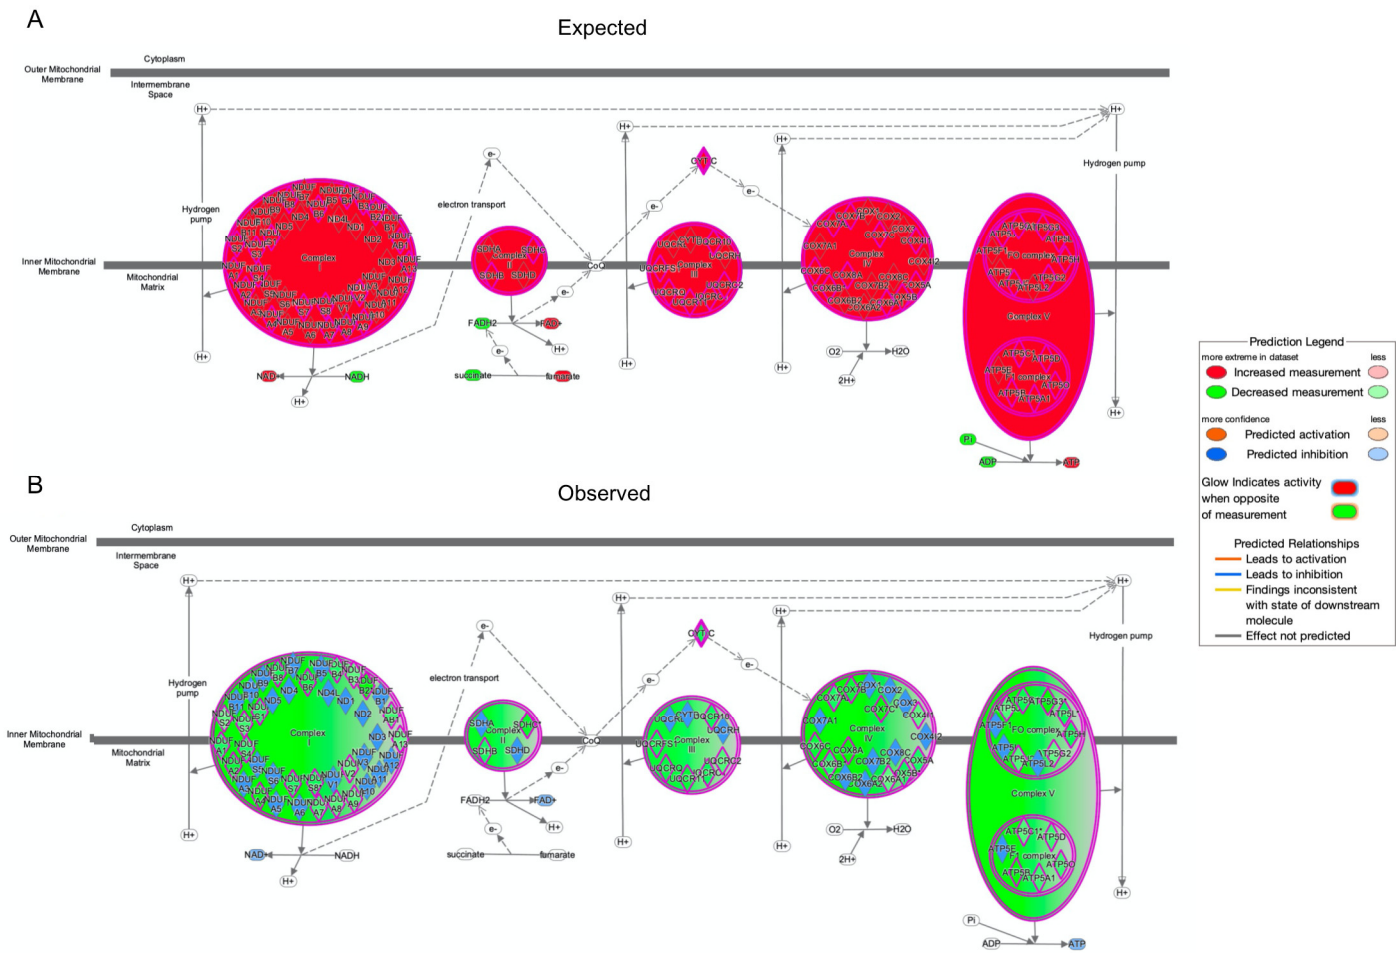

**Supplementary Table S1.** Differentially expressed genes between CNIT and Normal samples (FDR <5%, FC $\geq$ 1.5)

[Provided separately as Excel Sheet]

**Supplemental Table S2.** Differentially expressed microRNAs between CNIT and NA samples (FDR <5%).

| ProbeSet | Transcript ID    | Fold Change | p-value<br>(a-level= 0.005) | q-value<br>(FDR= 5%) |
|----------|------------------|-------------|-----------------------------|----------------------|
| 20523000 | hsa-miR-6068     | 7.8         | 2.52E-06                    | 3.43E-04             |
| 20525541 | hsa-miR-6790-5p  | 5.5         | 6.21E-05                    | 3.13E-03             |
| 20506795 | hsa-miR-1202     | 4.5         | 2.72E-06                    | 3.46E-04             |
| 20504295 | hsa-miR-572      | 4.1         | 3.80E-04                    | 1.16E-02             |
| 20518940 | hsa-miR-1587     | 4.1         | 8.14E-06                    | 6.64E-04             |
| 20506006 | hsa-miR-937-5p   | 3.7         | 1.09E-07                    | 4.53E-05             |
| 20518904 | hsa-miR-4507     | 3.5         | 1.11E-07                    | 4.53E-05             |
| 20519497 | hsa-miR-4689     | 3.4         | 1.84E-04                    | 7.02E-03             |
| 20525565 | hsa-miR-6802-5p  | 3.3         | 1.77E-05                    | 1.29E-03             |
| 20524053 | hsa-miR-6132     | 3.3         | 2.09E-05                    | 1.33E-03             |
| 20525657 | hsa-miR-6848-5p  | 3.2         | 1.60E-03                    | 3.47E-02             |
| 20525383 | hsa-miR-6716-5p  | 3.1         | 2.81E-04                    | 1.01E-02             |
| 20518901 | hsa-miR-4505     | 3.1         | 8.77E-09                    | 1.79E-05             |
| 20519498 | hsa-miR-4690-5p  | 3.0         | 3.43E-04                    | 1.09E-02             |
| 20529799 | hsa-miR-8089     | 3.0         | 1.63E-04                    | 6.50E-03             |
| 20525747 | hsa-miR-6893-5p  | 2.9         | 3.27E-04                    | 1.06E-02             |
| 20519592 | hsa-miR-4741     | 2.9         | 5.84E-06                    | 4.96E-04             |
| 20518845 | hsa-miR-4463     | 2.8         | 3.19E-08                    | 3.25E-05             |
| 20517833 | hsa-miR-3620-5p  | 2.8         | 4.01E-07                    | 1.02E-04             |
| 20519457 | hsa-miR-4665-5p  | 2.8         | 1.45E-04                    | 6.16E-03             |
| 20518933 | hsa-miR-4532     | 2.7         | 9.43E-05                    | 4.37E-03             |
| 20519433 | hsa-miR-4651     | 2.7         | 1.34E-06                    | 1.96E-04             |
| 20519626 | hsa-miR-4758-5p  | 2.7         | 3.72E-07                    | 1.02E-04             |
| 20520198 | hsa-miR-5001-5p  | 2.7         | 6.76E-05                    | 3.28E-03             |
| 20518807 | hsa-miR-4433-3p  | 2.6         | 1.20E-04                    | 5.44E-03             |
| 20525603 | hsa-miR-6821-5p  | 2.6         | 2.33E-05                    | 1.40E-03             |
| 20515624 | hsa-miR-3188     | 2.6         | 1.71E-03                    | 3.55E-02             |
| 20515641 | hsa-miR-3197     | 2.6         | 1.63E-03                    | 3.47E-02             |
| 20519600 | hsa-miR-4745-5p  | 2.6         | 9.74E-06                    | 7.64E-04             |
| 20515585 | hsa-miR-3162-5p  | 2.6         | 1.58E-03                    | 3.47E-02             |
| 20525459 | hsa-miR-6749-5p  | 2.6         | 1.88E-05                    | 1.32E-03             |
| 20523017 | hsa-miR-6085     | 2.5         | 5.74E-06                    | 4.96E-04             |
| 20525465 | hsa-miR-6752-5p  | 2.4         | 5.99E-07                    | 1.36E-04             |
| 20525394 | hsa-miR-6722-3p  | 2.4         | 4.89E-06                    | 4.54E-04             |
| 20506771 | hsa-miR-1227-5p  | 2.4         | 3.17E-06                    | 3.73E-04             |
| 20529131 | hsa-miR-4433b-3p | 2.4         | 1.89E-07                    | 6.42E-05             |
| 20519607 | hsa-miR-4749-5p  | 2.4         | 1.23E-04                    | 5.44E-03             |
| 20525519 | hsa-miR-6779-5p  | 2.4         | 9.54E-07                    | 1.77E-04             |

|          |                  |     |          |          |
|----------|------------------|-----|----------|----------|
| 20525559 | hsa-miR-6799-5p  | 2.4 | 1.11E-03 | 2.60E-02 |
| 20524036 | hsa-miR-6126     | 2.4 | 7.02E-05 | 3.33E-03 |
| 20525561 | hsa-miR-6800-5p  | 2.3 | 8.73E-04 | 2.10E-02 |
| 20525557 | hsa-miR-6798-5p  | 2.3 | 9.28E-07 | 1.77E-04 |
| 20517736 | hsa-miR-4281     | 2.3 | 3.47E-06 | 3.73E-04 |
| 20525549 | hsa-miR-6794-5p  | 2.3 | 4.72E-05 | 2.53E-03 |
| 20525497 | hsa-miR-6768-5p  | 2.3 | 2.30E-03 | 4.30E-02 |
| 20525525 | hsa-miR-6782-5p  | 2.3 | 2.04E-05 | 1.33E-03 |
| 20519636 | hsa-miR-4763-3p  | 2.3 | 4.87E-06 | 4.54E-04 |
| 20525543 | hsa-miR-6791-5p  | 2.3 | 1.06E-07 | 4.53E-05 |
| 20525503 | hsa-miR-6771-5p  | 2.2 | 6.30E-05 | 3.13E-03 |
| 20515607 | hsa-miR-3178     | 2.2 | 7.24E-04 | 1.87E-02 |
| 20518892 | hsa-miR-4497     | 2.2 | 3.39E-06 | 3.73E-04 |
| 20519570 | hsa-miR-4728-5p  | 2.2 | 4.12E-04 | 1.24E-02 |
| 20525473 | hsa-miR-6756-5p  | 2.2 | 1.94E-05 | 1.32E-03 |
| 20519405 | hsa-miR-4632-5p  | 2.2 | 4.57E-04 | 1.30E-02 |
| 20525567 | hsa-miR-6803-5p  | 2.2 | 4.08E-06 | 4.16E-04 |
| 20525743 | hsa-miR-6891-5p  | 2.1 | 5.46E-04 | 1.49E-02 |
| 20525475 | hsa-miR-6757-5p  | 2.1 | 6.37E-04 | 1.68E-02 |
| 20506865 | hsa-miR-1268a    | 2.1 | 5.76E-05 | 3.01E-03 |
| 20519525 | hsa-miR-4707-5p  | 2.1 | 3.20E-04 | 1.06E-02 |
| 20525644 | hsa-miR-6840-3p  | 2.1 | 2.56E-03 | 4.66E-02 |
| 20518629 | hsa-miR-3940-5p  | 2.0 | 1.18E-06 | 1.96E-04 |
| 20526174 | hsa-miR-7108-5p  | 2.0 | 2.80E-05 | 1.59E-03 |
| 20519580 | hsa-miR-4734     | 2.0 | 1.61E-04 | 6.50E-03 |
| 20518913 | hsa-miR-4516     | 2.0 | 1.04E-05 | 7.87E-04 |
| 20525396 | hsa-miR-6724-5p  | 2.0 | 2.33E-05 | 1.40E-03 |
| 20526861 | hsa-miR-7150     | 1.9 | 2.45E-03 | 4.54E-02 |
| 20525677 | hsa-miR-6858-5p  | 1.9 | 1.25E-06 | 1.96E-04 |
| 20518782 | hsa-miR-1268b    | 1.9 | 1.41E-03 | 3.15E-02 |
| 20519474 | hsa-miR-4674     | 1.9 | 1.83E-03 | 3.72E-02 |
| 20517729 | hsa-miR-4270     | 1.9 | 2.63E-03 | 4.75E-02 |
| 20514163 | hsa-miR-2861     | 1.9 | 1.33E-04 | 5.79E-03 |
| 20523020 | hsa-miR-6088     | 1.7 | 3.52E-04 | 1.11E-02 |
| 20519493 | hsa-miR-4687-3p  | 1.6 | 2.80E-03 | 4.88E-02 |
| 20525699 | hsa-miR-6869-5p  | 1.6 | 1.90E-03 | 3.81E-02 |
| 20525681 | hsa-miR-6769b-5p | 1.6 | 5.09E-04 | 1.41E-02 |
| 20525533 | hsa-miR-6786-5p  | 1.6 | 1.58E-03 | 3.47E-02 |
| 20519507 | hsa-miR-4695-5p  | 1.6 | 6.44E-04 | 1.68E-02 |
| 20529779 | hsa-miR-8069     | 1.5 | 2.24E-03 | 4.27E-02 |
| 20504391 | hsa-miR-638      | 1.5 | 1.62E-03 | 3.47E-02 |

|          |                  |      |          |          |
|----------|------------------|------|----------|----------|
| 20507742 | hsa-miR-1469     | 1.5  | 1.53E-04 | 6.35E-03 |
| 20504586 | hsa-miR-762      | 1.5  | 2.89E-04 | 1.01E-02 |
| 20519679 | hsa-miR-4787-5p  | 1.4  | 2.86E-03 | 4.95E-02 |
| 20518905 | hsa-miR-4508     | 1.4  | 2.75E-04 | 1.00E-02 |
| 20525416 | hsa-miR-6727-5p  | 1.4  | 2.28E-03 | 4.30E-02 |
| 20525011 | hsa-miR-6505-5p  | 1.4  | 7.44E-04 | 1.90E-02 |
| 20519639 | hsa-miR-4765     | 1.3  | 2.70E-03 | 4.77E-02 |
| 20529765 | hsa-miR-8055     | -1.3 | 9.16E-04 | 2.17E-02 |
| 20501162 | hsa-miR-200a-5p  | -1.3 | 1.22E-03 | 2.79E-02 |
| 20500423 | hsa-miR-30c-2-3p | -1.8 | 1.25E-03 | 2.83E-02 |
| 20500848 | hsa-miR-320a     | -1.8 | 2.11E-03 | 4.14E-02 |
| 20529139 | hsa-miR-7847-3p  | -1.9 | 2.71E-03 | 4.77E-02 |
| 20517680 | hsa-miR-4298     | -1.9 | 1.73E-03 | 3.55E-02 |
| 20506835 | hsa-miR-1244     | -2.0 | 8.22E-04 | 2.00E-02 |
| 20501157 | hsa-miR-1244     | -2.0 | 2.11E-03 | 4.14E-02 |
| 20509070 | hsa-miR-320d     | -2.0 | 7.76E-04 | 1.93E-02 |
| 20504563 | hsa-miR-320c     | -2.1 | 8.18E-04 | 2.00E-02 |
| 20500484 | hsa-miR-221-3p   | -2.1 | 2.13E-03 | 4.14E-02 |
| 20500196 | hsa-miR-107      | -2.2 | 1.22E-03 | 2.79E-02 |
| 20529785 | hsa-miR-8075     | -2.2 | 3.71E-04 | 1.15E-02 |
| 20500171 | hsa-miR-92a-3p   | -2.3 | 1.85E-03 | 3.74E-02 |
| 20500119 | hsa-let-7d-5p    | -2.6 | 1.70E-03 | 3.55E-02 |
| 20500761 | hsa-miR-191-5p   | -2.6 | 1.80E-04 | 7.02E-03 |
| 20500173 | hsa-miR-93-5p    | -2.8 | 3.88E-05 | 2.14E-03 |
| 20501280 | hsa-miR-342-3p   | -2.8 | 2.51E-03 | 4.61E-02 |
| 20500148 | hsa-miR-24-3p    | -2.9 | 1.86E-04 | 7.02E-03 |
| 20500162 | hsa-miR-30a-5p   | -2.9 | 2.71E-03 | 4.77E-02 |
| 20500130 | hsa-miR-17-5p    | -3.0 | 2.19E-03 | 4.21E-02 |
| 20500146 | hsa-miR-23a-3p   | -3.2 | 5.13E-04 | 1.41E-02 |
| 20500137 | hsa-miR-19b-3p   | -3.2 | 6.23E-04 | 1.67E-02 |
| 20500721 | hsa-miR-23b-3p   | -3.3 | 2.98E-04 | 1.01E-02 |
| 20500152 | hsa-miR-26a-5p   | -3.4 | 4.19E-04 | 1.24E-02 |
| 20500769 | hsa-miR-126-3p   | -3.8 | 7.63E-04 | 1.92E-02 |
| 20517816 | hsa-miR-3609     | -3.9 | 2.78E-05 | 1.59E-03 |
| 20500422 | hsa-miR-30c-5p   | -4.5 | 2.92E-04 | 1.01E-02 |
| 20500765 | hsa-miR-125a-5p  | -4.7 | 2.08E-04 | 7.72E-03 |
| 20500400 | hsa-miR-199a-3p  | -5.6 | 4.54E-04 | 1.30E-02 |
| 20500458 | hsa-miR-199b-3p  | -5.6 | 4.54E-04 | 1.30E-02 |
| 20500798 | hsa-miR-195-5p   | -5.6 | 3.23E-04 | 1.06E-02 |

**Supplemental Table S3.** Differentially expressed CNIT-specific genes related to oxidative phosphorylation.

| Symbol  | Entrez Gene Name                               | Affymetrix  | Expr Fold Change |
|---------|------------------------------------------------|-------------|------------------|
| ATP5F1A | ATP synthase F1 subunit alpha                  | 213738_s_at | -1.7             |
| ATP5F1B | ATP synthase F1 subunit beta                   | 201322_at   | -2.4             |
| ATP5F1C | ATP synthase F1 subunit gamma                  | 208870_x_at | -1.6             |
| ATP5F1D | ATP synthase F1 subunit delta                  | 213041_s_at | -1.7             |
| ATP5MC1 | ATP synthase membrane subunit c locus 1        | 208972_s_at | -2               |
| ATP5MC2 | ATP synthase membrane subunit c locus 2        | 208764_s_at | -1.5             |
| ATP5MC3 | ATP synthase membrane subunit c locus 3        | 207508_at   | -2.7             |
| ATP5MF  | ATP synthase membrane subunit f                | 202961_s_at | -1.6             |
| ATP5MG  | ATP synthase membrane subunit g                | 210453_x_at | -1.9             |
| ATP5PD  | ATP synthase peripheral stalk subunit d        | 210149_s_at | -2               |
| ATP5PF  | ATP synthase peripheral stalk subunit F6       | 202325_s_at | -1.6             |
| ATP5PO  | ATP synthase peripheral stalk subunit OSCP     | 200818_at   | -1.7             |
| COX17   | cytochrome c oxidase copper chaperone COX17    | 203880_at   | -1.8             |
| COX4I1  | cytochrome c oxidase subunit 4I1               | 202698_x_at | -1.5             |
| COX5A   | cytochrome c oxidase subunit 5A                | 203663_s_at | -1.8             |
| COX5B   | cytochrome c oxidase subunit 5B                | 213736_at   | -1.9             |
| COX6A1  | cytochrome c oxidase subunit 6A1               | 200925_at   | -1.5             |
| COX6B1  | cytochrome c oxidase subunit 6B1               | 201441_at   | -1.8             |
| COX6C   | cytochrome c oxidase subunit 6C                | 201754_at   | -2.2             |
| COX7A2  | cytochrome c oxidase subunit 7A2               | 201597_at   | -1.8             |
| COX7B   | cytochrome c oxidase subunit 7B                | 202110_at   | -2.2             |
| COX7C   | cytochrome c oxidase subunit 7C                | 213846_at   | -2.9             |
| COX8A   | cytochrome c oxidase subunit 8A                | 201119_s_at | -2.7             |
| CYB5A   | cytochrome b5 type A                           | 215726_s_at | -1.9             |
| CYC1    | cytochrome c1                                  | 201066_at   | -2               |
| NDUFA1  | NADH:ubiquinone oxidoreductase subunit A1      | 202298_at   | -1.8             |
| NDUFA2  | NADH:ubiquinone oxidoreductase subunit A2      | 209224_s_at | -2.2             |
| NDUFA4  | NDUFA4 mitochondrial complex associated        | 217773_s_at | -2.5             |
| NDUFA7  | NADH:ubiquinone oxidoreductase subunit A7      | 202785_at   | -1.7             |
| NDUFA8  | NADH:ubiquinone oxidoreductase subunit A8      | 218160_at   | -1.6             |
| NDUFA9  | NADH:ubiquinone oxidoreductase subunit A9      | 208969_at   | -1.6             |
| NDUFA13 | NADH:ubiquinone oxidoreductase subunit A13     | 220864_s_at | -1.5             |
| NDUFAB1 | NADH:ubiquinone oxidoreductase subunit AB1     | 202077_at   | -1.7             |
| NDUFB2  | NADH:ubiquinone oxidoreductase subunit B2      | 218200_s_at | -2.9             |
| NDUFB3  | NADH:ubiquinone oxidoreductase subunit B3      | 203371_s_at | -1.5             |
| NDUFB4  | NADH:ubiquinone oxidoreductase subunit B4      | 218226_s_at | -1.8             |
| NDUFB6  | NADH:ubiquinone oxidoreductase subunit B6      | 203613_s_at | -2.1             |
| NDUFB8  | NADH:ubiquinone oxidoreductase subunit B8      | 201227_s_at | -2               |
| NDUFS1  | NADH:ubiquinone oxidoreductase core subunit S1 | 203039_s_at | -1.8             |
| NDUFS2  | NADH:ubiquinone oxidoreductase core subunit S2 | 201966_at   | -1.5             |

|         |                                                                    |             |      |
|---------|--------------------------------------------------------------------|-------------|------|
| NDUFS3  | NADH:ubiquinone oxidoreductase core subunit S3                     | 201740_at   | -1.7 |
| NDUFS4  | NADH:ubiquinone oxidoreductase subunit S4                          | 209303_at   | -1.8 |
| NDUFS7  | NADH:ubiquinone oxidoreductase core subunit S7                     | 211752_s_at | -1.8 |
| NDUFS8  | NADH:ubiquinone oxidoreductase core subunit S8                     | 203189_s_at | -1.9 |
| NDUFV2  | NADH:ubiquinone oxidoreductase core subunit V2                     | 202941_at   | -1.5 |
| SDHB    | succinate dehydrogenase complex iron sulfur subunit B              | 202675_at   | -1.8 |
| SDHC    | succinate dehydrogenase complex subunit C                          | 216591_s_at | -2.3 |
| SURF1   | SURF1 cytochrome c oxidase assembly factor                         | 204295_at   | -1.6 |
| UQCR10  | ubiquinol-cytochrome c reductase, complex III subunit X            | 218190_s_at | -1.9 |
| UQCR11  | ubiquinol-cytochrome c reductase, complex III subunit XI           | 202090_s_at | -2.2 |
| UQCRC1  | ubiquinol-cytochrome c reductase core protein 1                    | 201903_at   | -1.9 |
| UQCRC2  | ubiquinol-cytochrome c reductase core protein 2                    | 200883_at   | -1.6 |
| UQCRFS1 | ubiquinol-cytochrome c reductase, Rieske iron-sulfur polypeptide 1 | 208909_at   | -2   |
| UQCRQ   | ubiquinol-cytochrome c reductase complex III subunit VII           | 201568_at   | -2.1 |
